# Supplementary material for: Evaluating sensitivity and specificity of handheld point-of-care ultrasound testing for gynecologic pathology: a pilot study for use in low resource settings
Source: Springer Nature journal article supplement (doi:10.1186/s12880-020-00518-8), 2020-10-27
Supplement: MOESM1 [file 18525990]

Appendix B

Supplemental table 1. Evaluating the accuracy of POC-US for gynecologic pathology

|                       |        |                   | DX-US             |                  | Total |
|-----------------------|--------|-------------------|-------------------|------------------|-------|
|                       |        |                   | Pathology present | Pathology absent |       |
| Endometrial pathology | POC-US | Pathology present | 10                | 1                | 11    |
|                       |        | Pathology absent  | 0                 | 27               | 27    |
|                       |        | Total             | 10                | 28               | 38    |
| Adnexal pathology     | POC-US | Pathology present | 13                | 4                | 17    |
|                       |        | Pathology absent  | 4                 | 19               | 23    |
|                       |        | Total             | 17                | 23               | 40    |
| Myoma                 | POC-US | Pathology present | 8                 | 2                | 10    |
|                       |        | Pathology absent  | 2                 | 27               | 29    |
|                       |        | Total             | 10                | 29               | 39    |
